# Supplementary material for: Kaposi's Sarcoma Herpesvirus MicroRNAs Induce Metabolic Transformation of Infected Cells
Source: PubMed Central journal article supplement (PMC4177984; doi:10.1371/journal.ppat.1004400), 2014-09-25
Supplement: ppat.1004400.s008.pdf [file ppat.1004400.s008.pdf]

Table S1

| Gene  | microRNA          | Position | mRNA down regulation (figure 3C) | Reduced luciferase activity (figure 3D) |
|-------|-------------------|----------|----------------------------------|-----------------------------------------|
| EGLN2 | kshv-mir-k12-6-3p | 1510     | +                                | +                                       |
| EGLN2 | kshv-mir-k12-6-5p | 346      | +                                | +                                       |
| EGLN2 | kshv-mir-k12-8    | 511      | +                                | +                                       |
| EGLN2 | kshv-mir-k12-3    | 451      | +                                | +                                       |
| EGLN2 | kshv-mir-k12-7    | 454      | -                                | +                                       |
| EGLN2 | kshv-mir-k12-8    | 430      | +                                | +                                       |
| EGLN2 | kshv-mir-k12-8    | 1561     | +                                | +                                       |
| EGLN2 | kshv-mir-k12-6-5p | 640      | +                                | +                                       |
| EGLN2 | kshv-mir-k12-11   | 1521     | +                                | +                                       |
| EGLN2 | kshv-mir-k12-9    | 1566     | -                                | -                                       |
| EGLN2 | kshv-mir-k12-7    | 1062     | -                                | +                                       |
| EGLN2 | kshv-mir-k12-6-3p | 1457     | +                                | +                                       |
| HSPA9 | kshv-mir-k12-11   | 3210     | +                                | +                                       |
| HSPA9 | kshv-mir-k12-4-3p | 2458     | +                                | -                                       |
| HSPA9 | kshv-mir-k12-4-3p | 2436     | +                                | -                                       |
| HSPA9 | kshv-mir-k12-3    | 1609     | +                                | +                                       |
