# Supplementary material for: Kaposi's Sarcoma Herpesvirus MicroRNAs Induce Metabolic Transformation of Infected Cells
Source: PubMed Central journal article supplement (PMC4177984; doi:10.1371/journal.ppat.1004400), 2014-09-25
Supplement: ppat.1004400.s009.pdf [file ppat.1004400.s009.pdf]

| targets          | miRIS       | p-value     | DB number | miR number | MAMI | PITA_TOP | PicTar_4way | RNA22 | TargetRank_all | TargetScan_Con | miRDB       | miRNAmap2 | microCosm | microRNA.org_Con | microT | mirZ        |
|------------------|-------------|-------------|-----------|------------|------|----------|-------------|-------|----------------|----------------|-------------|-----------|-----------|------------------|--------|-------------|
| hsa-let-7a       | 0.583333333 | 0.005167709 | 2         | 2          | -    | X        | X           | -     | -              | 0.005167709    | -           | -         | -         | -                | X      | 0.015076521 |
| hsa-let-7b       | 0.583333333 | 0.005167709 | 2         | 2          | -    | X        | X           | -     | -              | 0.005167709    | -           | -         | -         | -                | X      | 0.015076521 |
| hsa-let-7c       | 0.583333333 | 0.005167709 | 2         | 2          | -    | X        | X           | -     | -              | 0.005167709    | -           | -         | -         | -                | X      | 0.015076521 |
| hsa-let-7e       | 0.583333333 | 0.005167709 | 2         | 2          | -    | X        | X           | -     | -              | 0.005167709    | -           | -         | -         | -                | X      | 0.015076521 |
| hsa-let-7f       | 0.583333333 | 0.005167709 | 2         | 2          | -    | X        | X           | -     | -              | 0.005167709    | -           | -         | -         | -                | X      | 0.015076521 |
| hsa-let-7g       | 0.583333333 | 0.005167709 | 2         | 2          | -    | X        | X           | -     | -              | 0.005167709    | -           | -         | -         | -                | X      | 0.015076521 |
| hsa-let-7i       | 0.583333333 | 0.005167709 | 2         | 2          | -    | X        | X           | -     | -              | 0.005167709    | -           | -         | -         | -                | X      | 0.015076521 |
| hsa-miR-103      | 0.583333333 | 0.007581338 | 2         | 2          | -    | X        | 0.007581338 | -     | -              | -              | -           | -         | -         | -                | X      | 0.04947369  |
| hsa-miR-107      | 0.583333333 | 0.007738576 | 2         | 2          | -    | X        | 0.007738576 | -     | -              | -              | -           | -         | -         | -                | X      | 0.04947369  |
| hsa-miR-1202     | 0.583333333 | 0.000403914 | 2         | 2          | -    | X        | -           | -     | -              | 0.000403914    | -           | -         | -         | -                | -      | 0.023484485 |
| hsa-miR-1301     | 0.625       | 0.000411296 | 3         | 2          | -    | X        | -           | -     | -              | 0.000686071    | 0.000411296 | -         | -         | -                | -      | 0.003696582 |
| hsa-miR-15a      | 0.625       | 0.007716015 | 3         | 2          | -    | X        | 0.007716015 | -     | -              | 0.007751323    | -           | -         | -         | -                | X      | 0.044724581 |
| hsa-miR-15b      | 0.625       | 0.007751323 | 3         | 2          | -    | X        | 0.007874637 | -     | -              | 0.007751323    | -           | -         | -         | -                | X      | 0.044724581 |
| hsa-miR-16       | 0.625       | 0.007626098 | 3         | 2          | -    | X        | 0.007626098 | -     | -              | 0.007751323    | -           | -         | -         | -                | X      | 0.044724581 |
| hsa-miR-195      | 0.625       | 0.007751323 | 3         | 2          | -    | X        | 0.007783798 | -     | -              | 0.007751323    | -           | -         | -         | -                | X      | 0.044724581 |
| hsa-miR-2110     | 0.583333333 | 0.000270006 | 2         | 2          | -    | -        | -           | -     | -              | 0.000270006    | -           | -         | -         | -                | -      | 0.041187155 |
| hsa-miR-23a      | 0.625       | 0.003630087 | 3         | 2          | -    | X        | 0.003630087 | -     | -              | 0.006028147    | -           | -         | -         | -                | X      | 0.041229075 |
| hsa-miR-23b      | 0.625       | 0.003661081 | 3         | 2          | -    | X        | 0.003661081 | -     | -              | 0.006028147    | -           | -         | -         | -                | X      | 0.041229075 |
| hsa-miR-23c      | 0.583333333 | 0.006028147 | 2         | 2          | -    | -        | -           | -     | -              | 0.006028147    | -           | -         | -         | -                | -      | 0.041229075 |
| hsa-miR-3150a-3p | 0.583333333 | 0.000214377 | 2         | 2          | -    | -        | -           | -     | -              | 0.000214377    | 0.000530276 | -         | -         | -                | -      | -           |
| hsa-miR-326      | 0.583333333 | 0.001618529 | 2         | 2          | -    | X        | 0.001618529 | -     | -              | -              | -           | -         | -         | -                | X      | 0.045191637 |
| hsa-miR-346      | 0.583333333 | 0.000545214 | 2         | 2          | -    | X        | X           | -     | 0.000545214    | -              | -           | -         | -         | -                | X      | 0.013211012 |
| hsa-miR-3652     | 0.583333333 | 0.000532748 | 2         | 2          | -    | -        | -           | -     | -              | 0.000532748    | -           | -         | -         | -                | -      | 0.036983521 |
| hsa-miR-3660     | 0.583333333 | 0.000347761 | 2         | 2          | -    | -        | -           | -     | -              | 0.000347761    | -           | -         | -         | -                | -      | 0.027071968 |
| hsa-miR-3921     | 0.583333333 | 0.000740708 | 2         | 2          | -    | -        | -           | -     | -              | 0.000740708    | -           | -         | -         | -                | -      | 0.025224496 |
| hsa-miR-3944-5p  | 0.583333333 | 5.91E-05    | 2         | 2          | -    | -        | -           | -     | -              | 0.000464266    | 5.91E-05    | -         | -         | -                | -      | -           |
| hsa-miR-4268     | 0.583333333 | 0.000205728 | 2         | 2          | -    | -        | -           | -     | -              | 0.000205728    | -           | -         | -         | -                | -      | 0.022918299 |
| hsa-miR-4290     | 0.583333333 | 0.00025075  | 2         | 2          | -    | -        | -           | -     | -              | 0.00025075     | -           | -         | -         | -                | -      | 0.023242487 |
| hsa-miR-455-3p   | 0.583333333 | 0.000456948 | 2         | 2          | -    | X        | -           | -     | -              | 0.000456948    | -           | -         | -         | -                | X      | 0.017011281 |
| hsa-miR-4660     | 0.583333333 | 0.00011131  | 2         | 2          | -    | -        | -           | -     | -              | 0.000695031    | 0.00011131  | -         | -         | -                | -      | -           |
| hsa-miR-5047     | 0.583333333 | 0.000406666 | 2         | 2          | -    | -        | -           | -     | -              | 0.000686071    | 0.000406666 | -         | -         | -                | -      | -           |
| hsa-miR-545      | 0.583333333 | 0.006147437 | 2         | 2          | -    | X        | -           | -     | 0.006147437    | -              | -           | -         | -         | -                | X      | 0.046251384 |
| hsa-miR-765      | 0.583333333 | 0.000455127 | 2         | 2          | -    | X        | -           | -     | 0.003425318    | 0.000455127    | -           | -         | -         | -                | X      | X           |
| hsa-miR-939      | 0.583333333 | 0.000180852 | 2         | 2          | -    | X        | -           | -     | -              | 0.000180852    | -           | -         | -         | -                | X      | 0.044710025 |
| hsa-miR-98       | 0.583333333 | 0.005167709 | 2         | 2          | -    | X        | X           | -     | -              | 0.005167709    | -           | -         | -         | -                | X      | 0.015076521 |
