# Supplementary material for: Kaposi's Sarcoma Herpesvirus MicroRNAs Induce Metabolic Transformation of Infected Cells
Source: PubMed Central journal article supplement (PMC4177984; doi:10.1371/journal.ppat.1004400), 2014-09-25
Supplement: ppat.1004400.s010.pdf [file ppat.1004400.s010.pdf]

Table S3

| targets         | miRIS       | p-value     | DB number | miR number | MAMI | PITA_TOP | PicTar_4way | RNA22 | TargetRank_all | TargetScan_Con | miRDB       | miRNAMap2 | microCosm | microRNA.org_Con | microT      | mirZ        |
|-----------------|-------------|-------------|-----------|------------|------|----------|-------------|-------|----------------|----------------|-------------|-----------|-----------|------------------|-------------|-------------|
| hsa-miR-106a    | 0.416666667 | 0.019238648 | 2         | 2          | -    | X        | -           | -     | 0.020641682    | 0.019238648    | -           | -         | -         | -                | X           | X           |
| hsa-miR-106b    | 0.416666667 | 0.019238648 | 2         | 2          | -    | X        | X           | -     | 0.020641682    | 0.019238648    | -           | -         | -         | -                | X           | X           |
| hsa-miR-17      | 0.416666667 | 0.019238648 | 2         | 2          | -    | X        | -           | -     | 0.020641682    | 0.019238648    | -           | -         | -         | -                | X           | X           |
| hsa-miR-20a     | 0.416666667 | 0.019238648 | 2         | 2          | -    | X        | X           | -     | 0.020641682    | 0.019238648    | -           | -         | -         | -                | X           | X           |
| hsa-miR-20b     | 0.416666667 | 0.019238648 | 2         | 2          | -    | X        | X           | -     | 0.020641682    | 0.019238648    | -           | -         | -         | -                | X           | X           |
| hsa-miR-3126-3p | 0.416666667 | 0.000276701 | 2         | 2          | -    | -        | -           | -     | -              | -              | 0.000276701 | -         | -         | -                | -           | 0.049278021 |
| hsa-miR-3128    | 0.416666667 | 0.000553185 | 2         | 2          | -    | -        | -           | -     | -              | 0.001614342    | 0.000553185 | -         | -         | -                | -           | -           |
| hsa-miR-346     | 0.666666667 | 0.001517859 | 4         | 3          | -    | X        | X           | -     | 0.001610288    | -              | -           | -         | -         | 0.008616857      | 0.047545634 | 0.001517859 |
| hsa-miR-424     | 0.625       | 0.016282592 | 3         | 3          | -    | X        | -           | -     | -              | 0.021889996    | -           | -         | -         | -                | 0.017823325 | 0.016282592 |
| hsa-miR-429     | 0.416666667 | 0.006982186 | 2         | 2          | -    | X        | -           | -     | 0.020895104    | -              | 0.006982186 | -         | -         | -                | X           | X           |
| hsa-miR-497     | 0.625       | 0.016282592 | 3         | 3          | -    | X        | -           | -     | -              | 0.021889996    | -           | -         | -         | -                | 0.017466869 | 0.016282592 |
| hsa-miR-519d    | 0.458333333 | 0.007262511 | 3         | 2          | -    | X        | -           | -     | 0.020641682    | 0.019238648    | 0.007262511 | -         | -         | -                | X           | X           |
| hsa-miR-545     | 0.583333333 | 0.009945011 | 2         | 3          | -    | X        | -           | -     | 0.017479471    | -              | -           | -         | -         | -                | X           | 0.009945011 |
| hsa-miR-93      | 0.416666667 | 0.019238648 | 2         | 2          | -    | X        | X           | -     | 0.020641682    | 0.019238648    | -           | -         | -         | -                | X           | X           |
