# Supplementary material for: Kaposi's Sarcoma Herpesvirus MicroRNAs Induce Metabolic Transformation of Infected Cells
Source: PubMed Central journal article supplement (PMC4177984; doi:10.1371/journal.ppat.1004400), 2014-09-25
Supplement: ppat.1004400.s011.pdf [file ppat.1004400.s011.pdf]

Table S4

|    |                   | Forward                                              | Reverse                                                                       | Probe                                      | comments                            |
|----|-------------------|------------------------------------------------------|-------------------------------------------------------------------------------|--------------------------------------------|-------------------------------------|
| 1  | HSPA9             | GTATTCTCTACTGCCGCTGATG                               | TTCAATCTGAGGAACCCACG                                                          |                                            | qRT-PCR                             |
| 2  | EGLN2             | GGTTGCTCATTCTTCTGGTCTG                               | CACCTTTCTGTCCTGATGCTAG                                                        |                                            | qRT-PCR                             |
| 3  | TOMM40            | GCA CTG TCA TGT CTC TAG CTG                          | CCT CAA ACT CCA CAC CCA C                                                     |                                            | qRT-PCR                             |
| 4  | TIMM23            | TCG GCT AGG ATT GAA GGA AAC                          | GAT GAC ACC AAA TGC ACT ATA GAG                                               |                                            | qRT-PCR                             |
| 5  | TIMM22            | GCC ATG TTT TCT TGT ACT GAG TG                       | GCA AAA CCT CCA CAA CCA ATG                                                   |                                            | qRT-PCR                             |
| 6  | TUBB              | ATG GAC GAG ATG GAG TTC                              | TTG AGT AAG ACG GCT AAG G                                                     |                                            | qRT-PCR                             |
| 7  | TOMM22            | GAT TGT TAT TGC TGT TTG AGC TG                       | CAC AGT GTC ATT ATA GAC TAA AG                                                |                                            | qRT-PCR                             |
| 8  | TIMM8B            | TGTAGACCGCTTCATTGACAC                                | CCCCACTGACCCTTAAATCTG                                                         |                                            | qRT-PCR                             |
| 9  | TIMM13            | TGGAAATGAACAGGGTGGG                                  | ACAACCTCCGAGCAGAAGT                                                           |                                            | qRT-PCR                             |
| 10 | TOMM20            | AGAGAAGCTTGCCAAGGAG                                  | CTACGCCCTTCTCATATTCAC                                                         |                                            | qRT-PCR                             |
| 11 | ORF65             | GGATGAGAGGGTTGTGAGAATG                               | CTCGGGAAGCAGTATAACCAC                                                         |                                            | qRT-PCR                             |
| 12 | K8.1              | TCCCAGCAATAAACCCACAG                                 | GTAACCGTGTGCCATTTTCTG                                                         |                                            | qRT-PCR                             |
| 13 | B2M               | ATC ATG GAG GTT TGA AGA TGC CGC                      | ACC AGA TTA ACC ACA ACC ATG CCT                                               | FAM-TAT CTG AGC AGG TTG CTC CAC AGG TA-TAM | qPCR for mitochondria copy number   |
| 14 | mit tRNA          | ATC ATC TCA ACT TAG TAT TAT ACC C                    | GTA CAA TGA GGA GTA GGA GGT TG                                                |                                            | qPCR for mitochondria copy number   |
| 15 | HSPA9<br>3'UTR    | CTC GAG TAA TAG CAG AAA TTT TGA AGC CAG              | GCG GCC GCT AGG GAA AGA AAT CTG GGT TC                                        |                                            | For cloning into luciferase assay   |
| 16 | HSPD1<br>3'UTR    | CTC GAG TCC TAG ACT AGT GCT TTA CC                   | GCG GCC GCT AAC TTT AAA CAA ATT TTT ATT<br>ACA C                              |                                            | For cloning into luciferase assay   |
| 17 | TOMM22<br>3'UTR   | CTC GAG TAG ATT GTT ATT GCT GTT TGA GC               | GCG GCC GCC CCT ACA AAT ACT TTA TAA TTA<br>CAC                                |                                            | For cloning into luciferase assay   |
| 18 | TOMM40<br>3'UTR   | CTC GAG CGG CTG AGC CCT CCT G                        | GCG GCC GCC TGT AAA ATG TCC CGG TTC T                                         |                                            | For cloning into luciferase assay   |
| 19 | TIM23<br>3'UTR    | CTC GAG AGA TTT TGC CAA CTC ATG AAT GG               | GCG GCC GCG GAG TTA TAA CTT TGG TTC TG                                        |                                            | For cloning into luciferase assay   |
| 20 | EGLN2<br>3'UTR    | CTC GAG GGC CAG TCC CAG AGC C                        | GCG GCC GCC AGA TGT GTG CAG CTC TGA                                           |                                            | For cloning into luciferase assay   |
| 21 | mirK3<br>mutation | GCC TGT AAT GGG CTA TGT GAG GGT GAG GAC<br>GGC AGC G | CGC TGC CGT CCT CAC CCT CAC ATA GCC CAT<br>TAC AGG C                          |                                            | For site directed mutagenesis       |
| 22 | HSPA9<br>Cloning  | GGA TCC ATG ATA AGT GCC AGC CGA G                    | GCG GCC GCT TAC TGT TTT TCC TCC TTT TGA TC                                    |                                            | For cloning into pENTR (BamHI+NotI) |
| 23 | HSPA9 Flag        | GGA TCC ATG ATA AGT GCC AGC CGA G                    | GCG GCC GCT TAc tta tcg tcg tca tcc ttg taa tcC<br>TGT TTT TCC TCC TTT TGA TC |                                            | For cloning into pENTR (BamHI+NotI) |
